# Supplementary figures and images for: A tale of two Walker Lane pull-apart basins in the ancestral Cascades arc, central Sierra Nevada, California
Source: Oxford University Press journal article supplement (doi:10.1130/ges01398.1), 2018-08-07

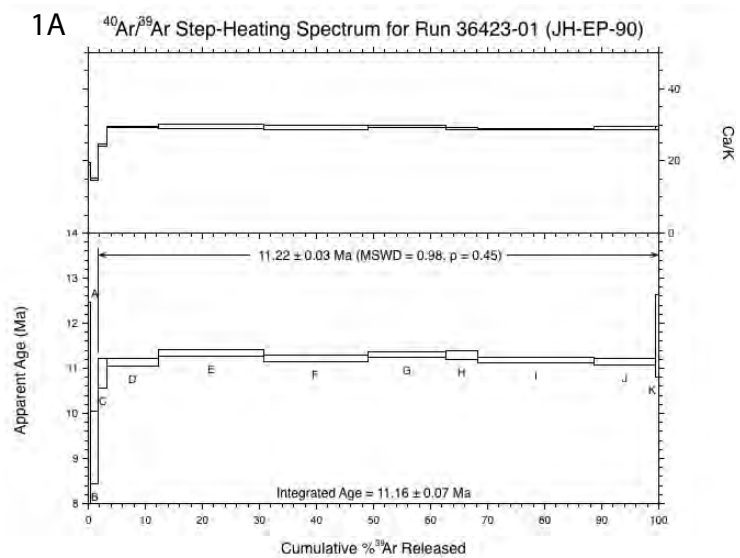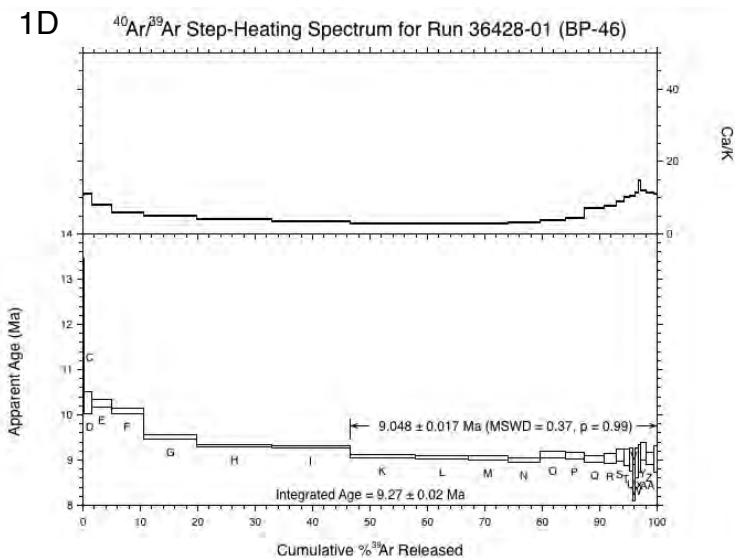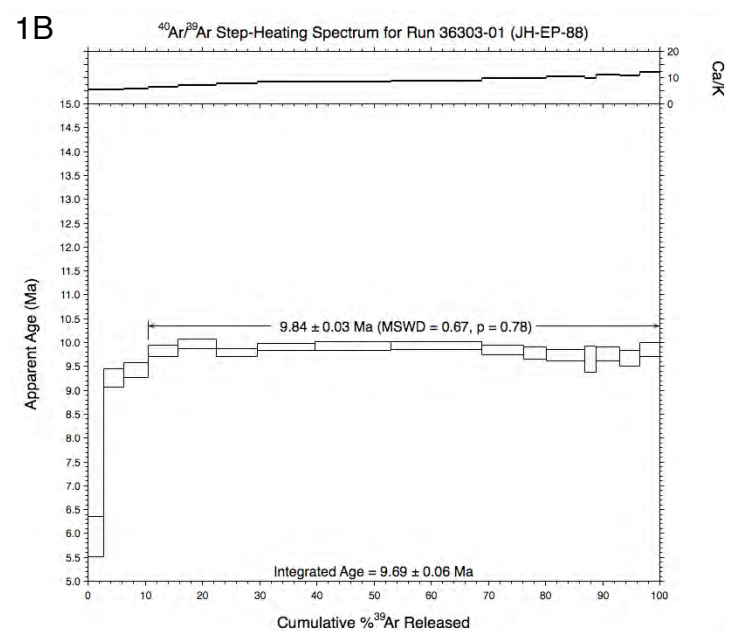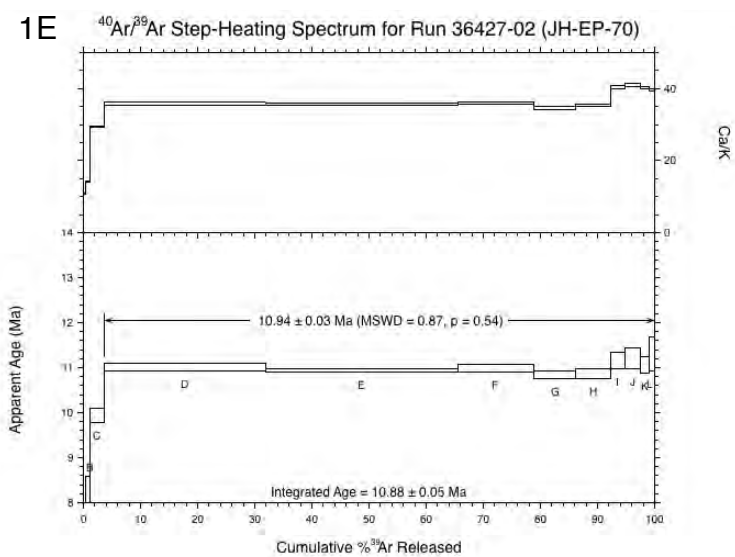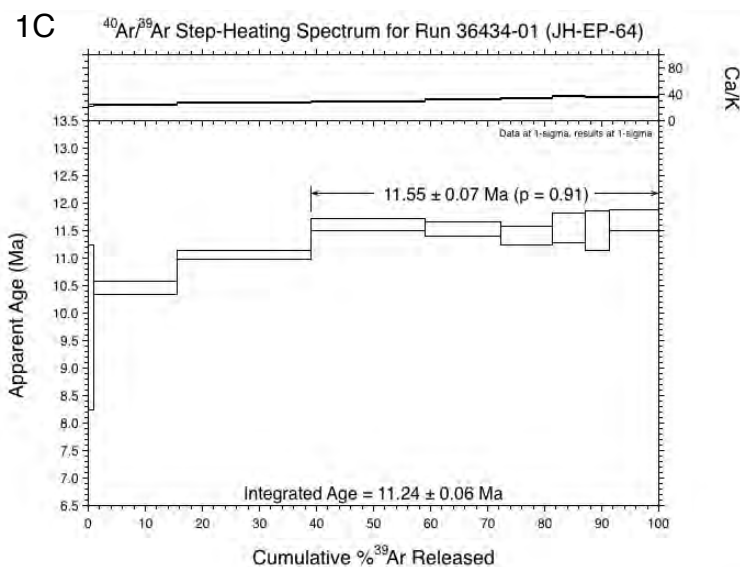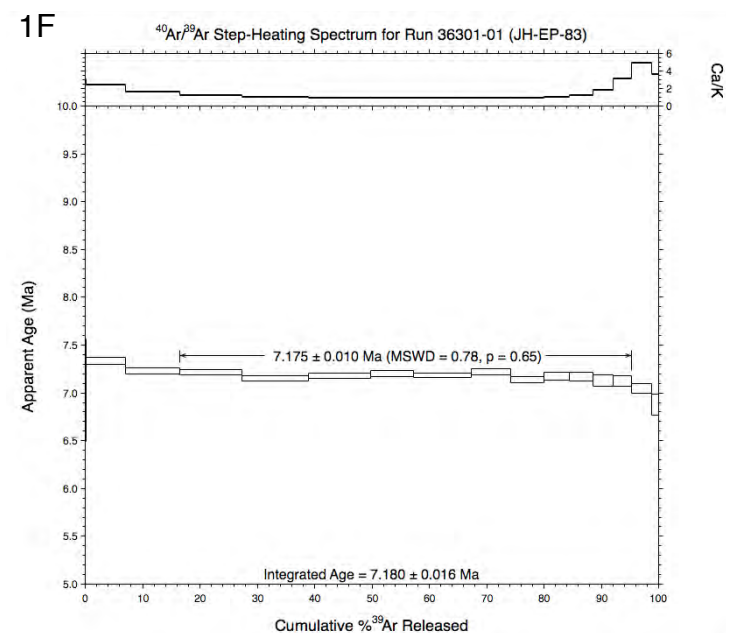

DATA REPOSITORY FIGURE 1

1-G1

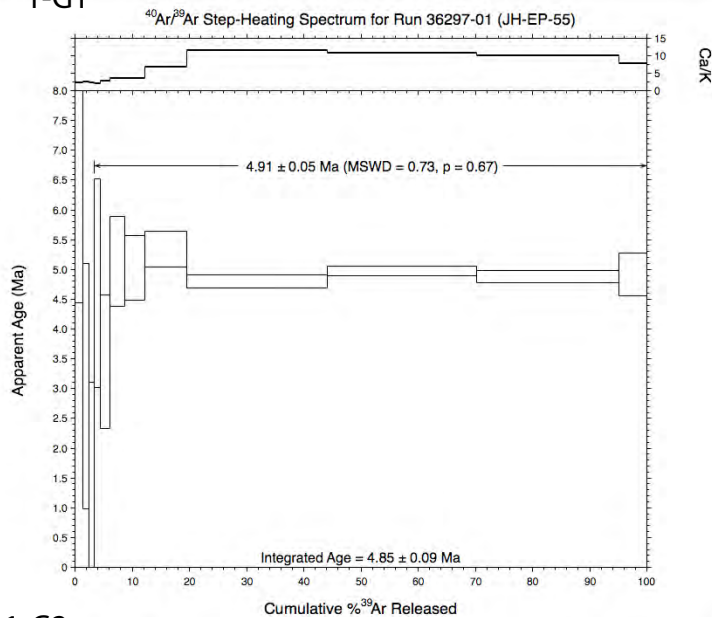

2-H2

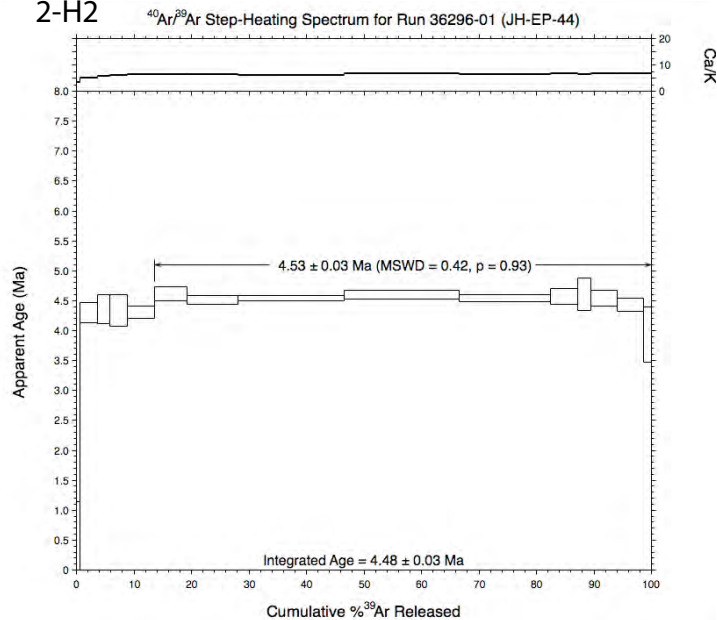

1-G2

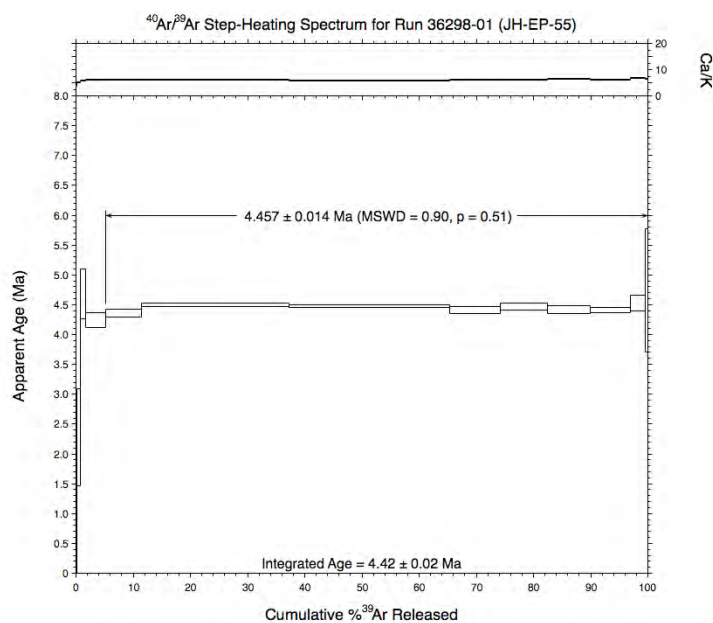

2-I

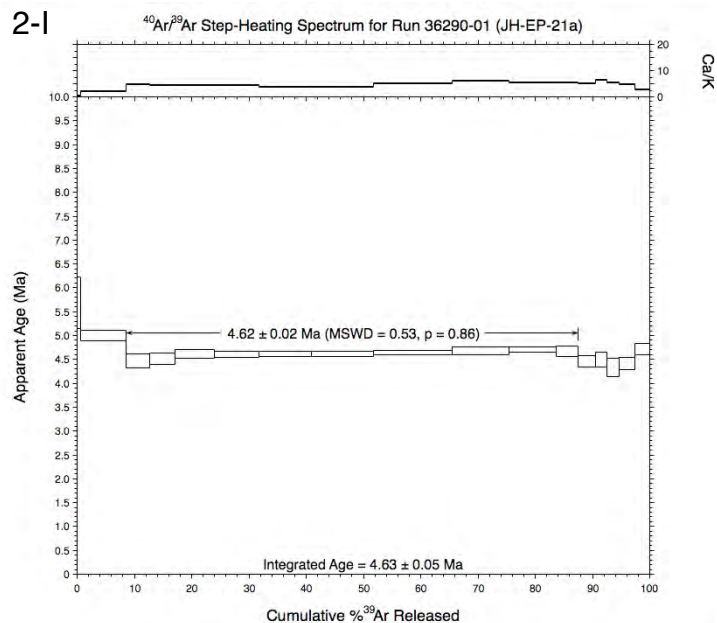

2-H1

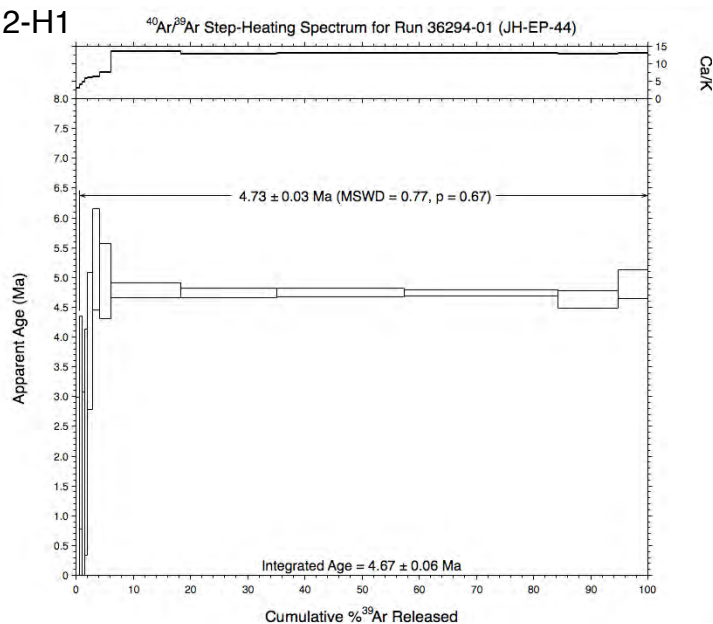

2-J

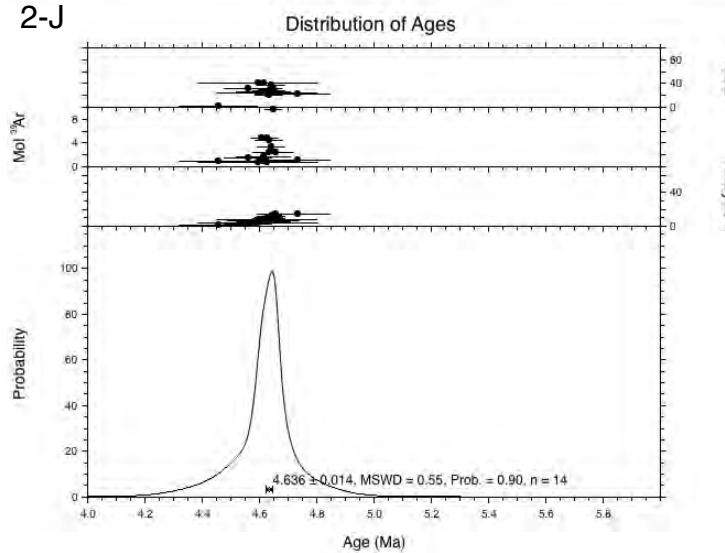

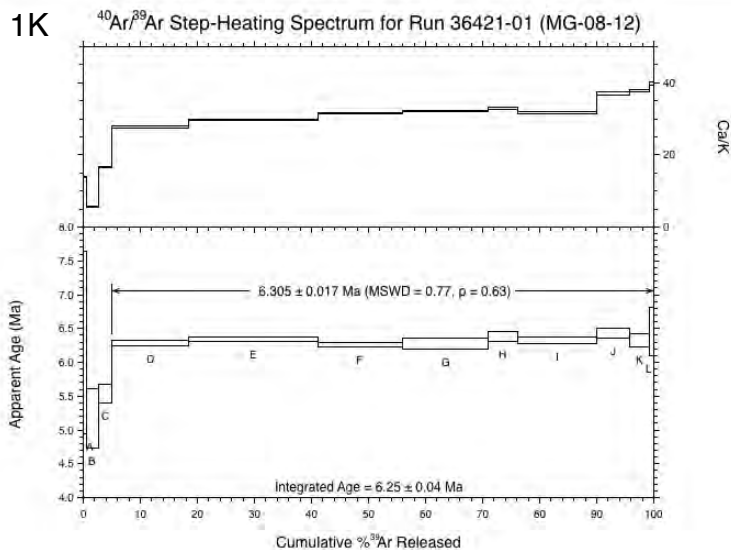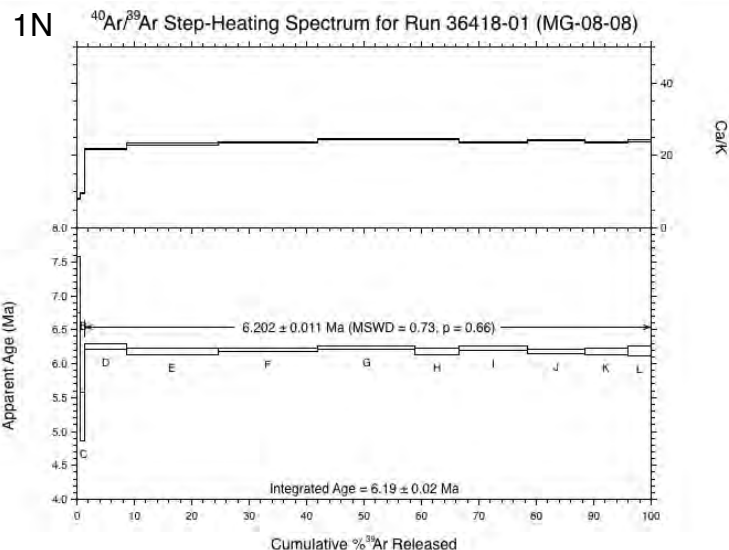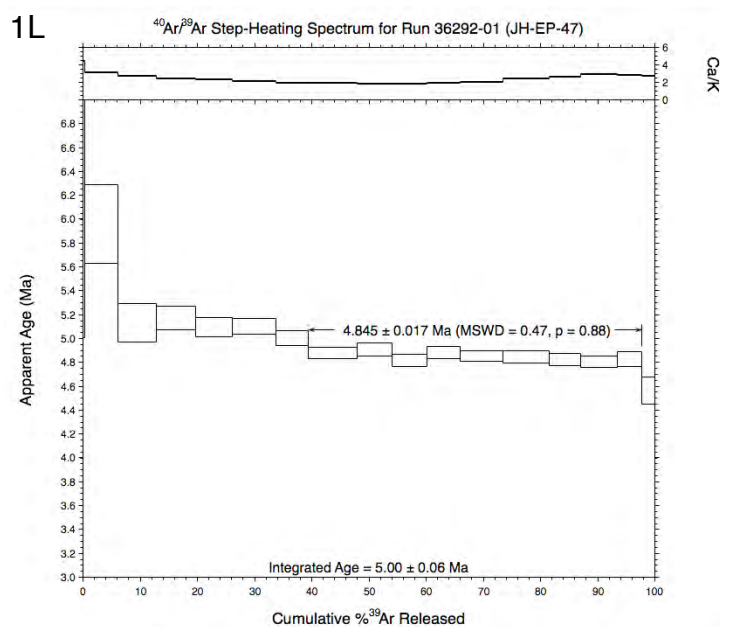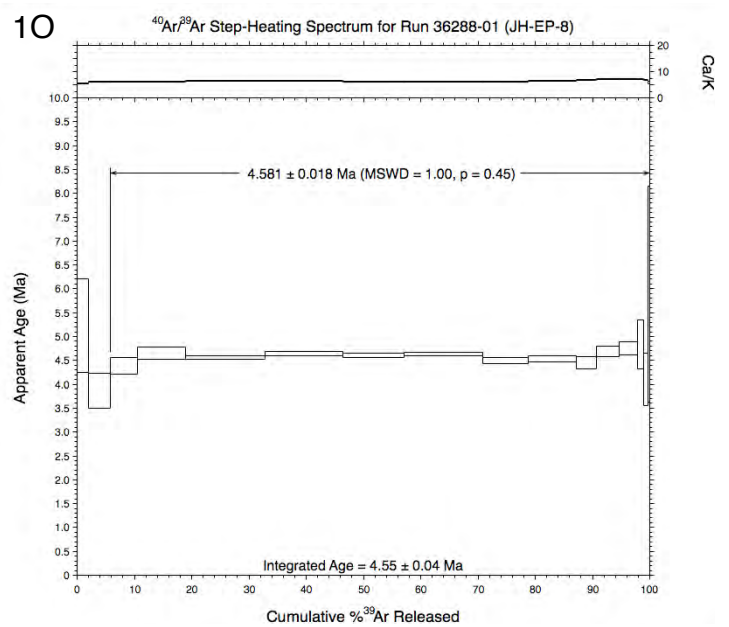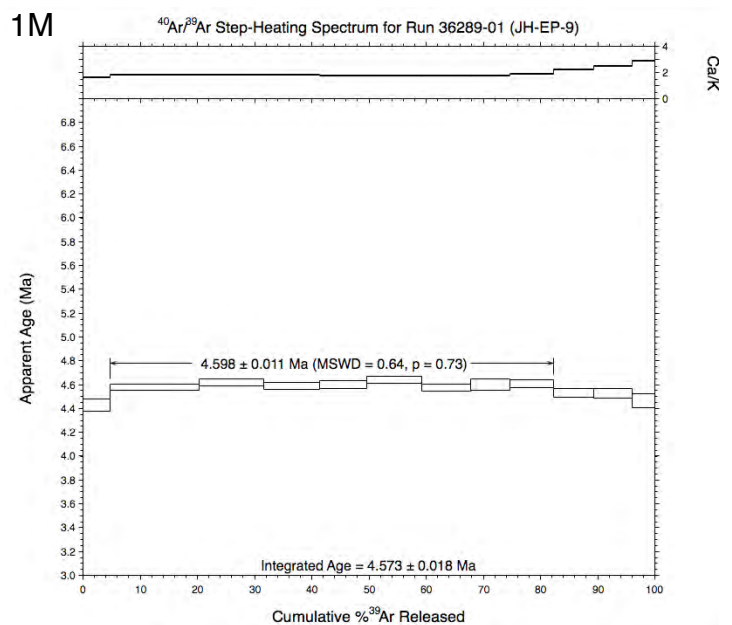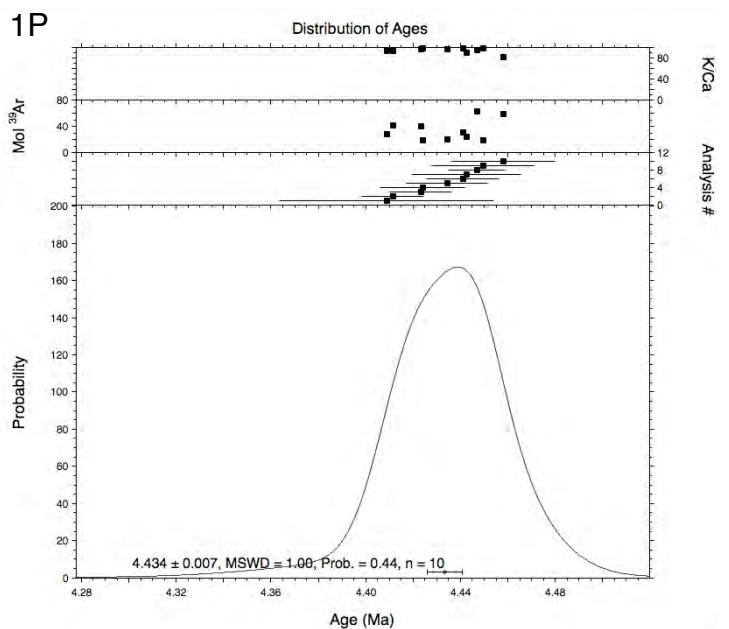

Q

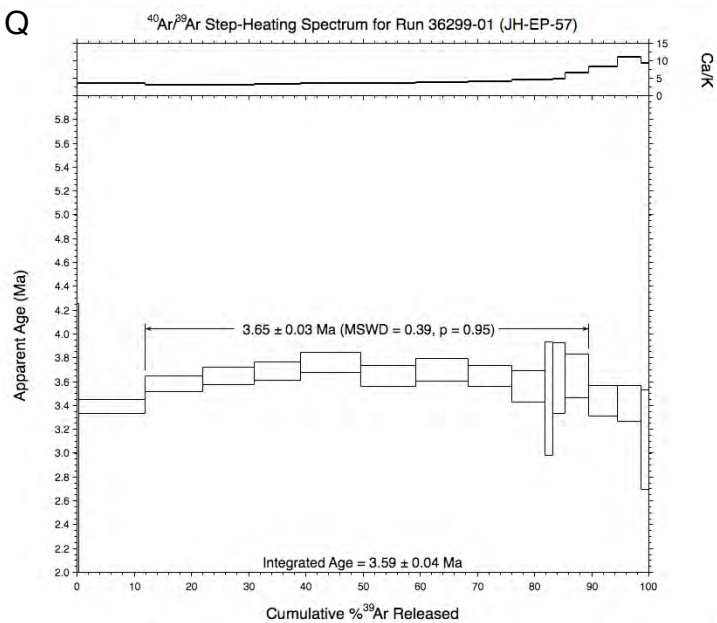

DATA REPOSITORY FIGURE 1, PAGE 4

Supplement: ges01398_suppfiles.zip [file ges01398_suppfiles.zip]
